# Supplementary material for: Hierarchal multi-lamellar silica vesicle clusters synthesized through self-assembly and mineralization
Source: Royal Society of Chemistry journal article supplement (doi:10.1039/c5ra19123h), 2015-01-01
Supplement: c5ra19123h1.pdf [file c5ra19123h1.pdf]

## Supporting Information

*for*

### Hierarchical Multi-lamellar Silica Vesicle Clusters Synthesized through Self-assembly and Mineralization

Yuan Yao<sup>‡</sup>, Ji Feng<sup>‡</sup>, Lu Han\* and Shunai Che

School of Chemistry and Chemical Engineering, State Key Laboratory Metal Matrix Composites, Shanghai Jiao Tong University, 800 Dongchuan Road, Shanghai, 200240 China

E-mail: [luhan@sjtu.edu.cn](mailto:luhan@sjtu.edu.cn)

#### The Analysis of PSPE

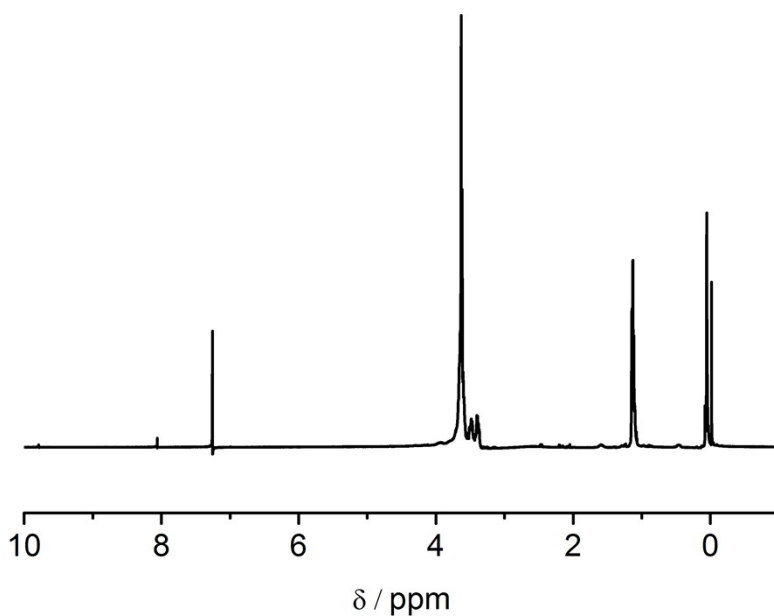

**Figure S1.** <sup>1</sup>H NMR data of the PSPE molecule.

**GPC:** PSPE molecular weight (Mn) = 15381 g/mol, polydispersity index (PDI) = 1.7

**<sup>1</sup>H NMR:** (δH, 400 MHz, CDCl<sub>3</sub>): 0.03-0.08 ppm, 0.58 eq (-Si(CH<sub>3</sub>)<sub>2</sub>-, -Si(CH<sub>3</sub>)<sub>3</sub> in PDMS); 1.12-1.16 ppm, 1.00 eq (-CH(CH<sub>3</sub>) in PPO segments); 3.35-2.58 ppm, 0.36 eq (-OCH(CH<sub>3</sub>)- in PPO segments); 3.60-3.68 ppm, 1.96 eq (-O-CH<sub>2</sub>- in PEO/PPO segments).

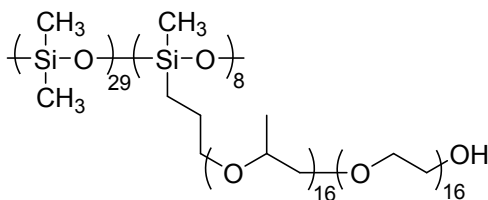

**Figure S2.** The formula of the PSPE molecule.

The unit parameters of the PSPE molecule were calculated based on the GPC and <sup>1</sup>H NMR data. The number of PO/EO block units in the side chain is 16/16, the number of grafted units is 8, and the number of PDMS units is 29. The PSPE molecule is shown in Figure S2 in detail.

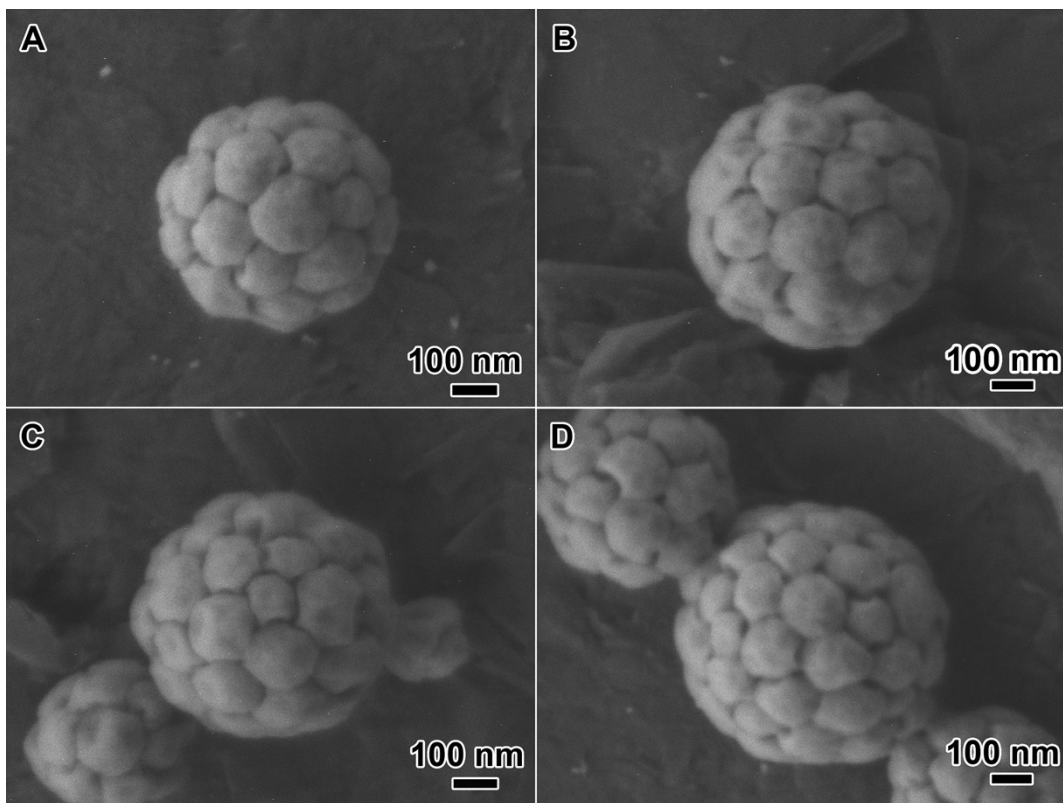

**Figure S3.** SEM image of MSVCs prepared under the same condition as the MSVCs shown in Figure 1. The synthesis was carried with the synthetic mass ratio of PSPE:P123:TEOS:H<sub>2</sub>O = 1:0.24:2.08:208 at 65 °C.
